# Supplementary material for: Understanding network concepts in modules
Source: Springer Nature journal article supplement (doi:10.1186/1752-0509-1-24), 2007-06-04

**A****Fly Protein–Protein Network**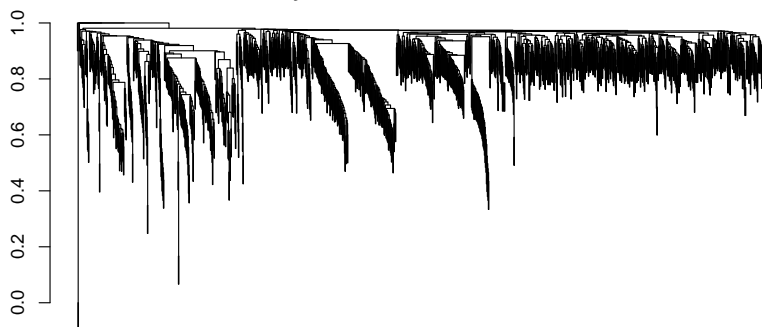**Colored by module membership**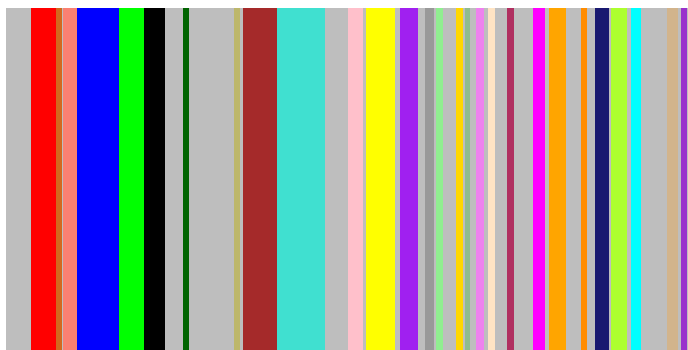**B****Yeast Protein–Protein Network**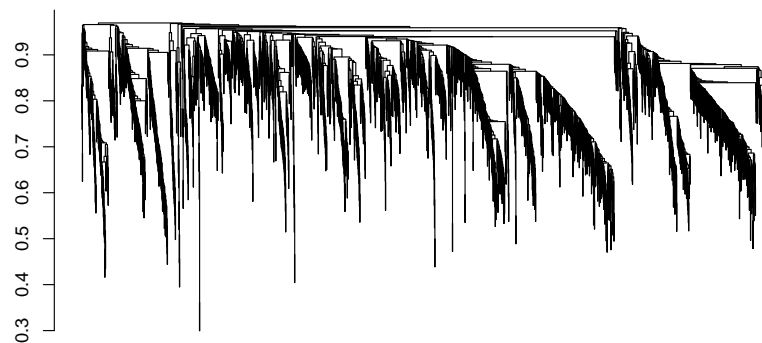**Colored by module membership**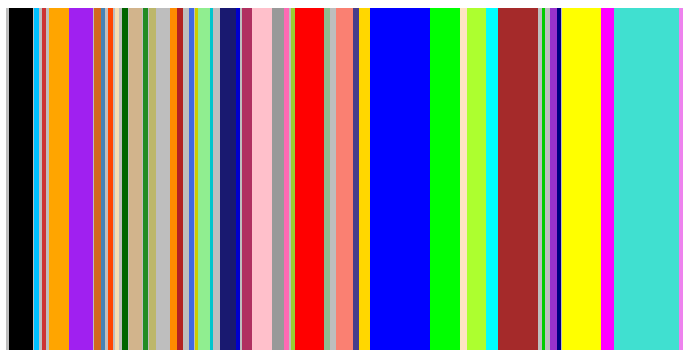**C****Yeast Co-expression Network: Soft Thresholding**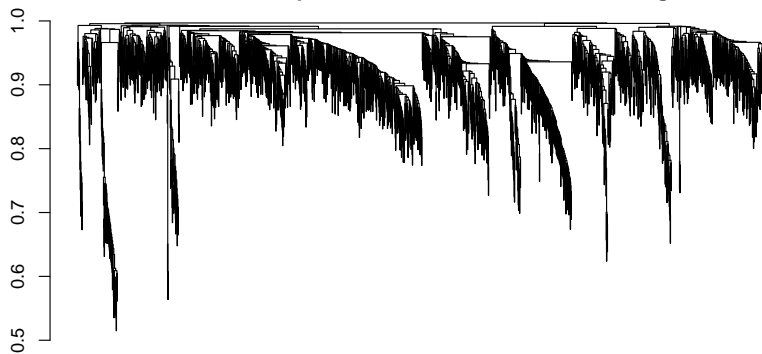**Colored by module membership**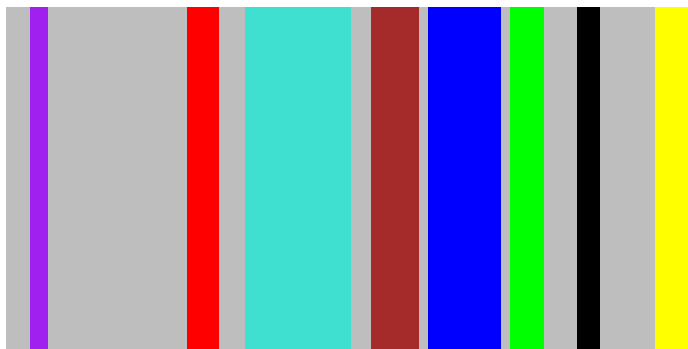**D****Yeast Co-expression Network: Hard Thresholding**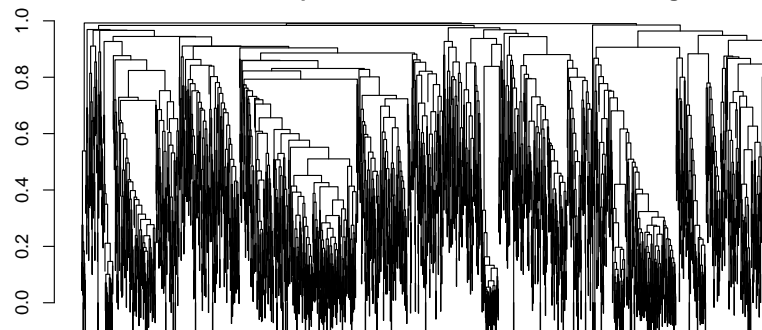**Colored by module membership of Soft Thresholding**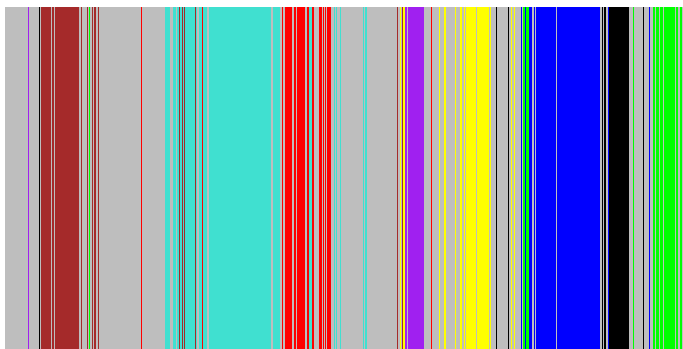

Supplement: 12918_2007_24_MOESM6_ESM.pdf [file 12918_2007_24_MOESM6_ESM.pdf]
