# Supplementary material for: Understanding network concepts in modules
Source: Springer Nature journal article supplement (doi:10.1186/1752-0509-1-24), 2007-06-04

A

 $R^2=0.99$ 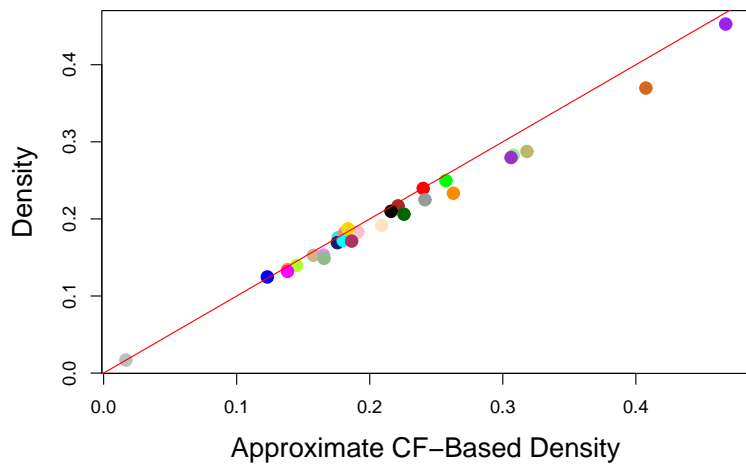

B

 $R^2=0.9$ 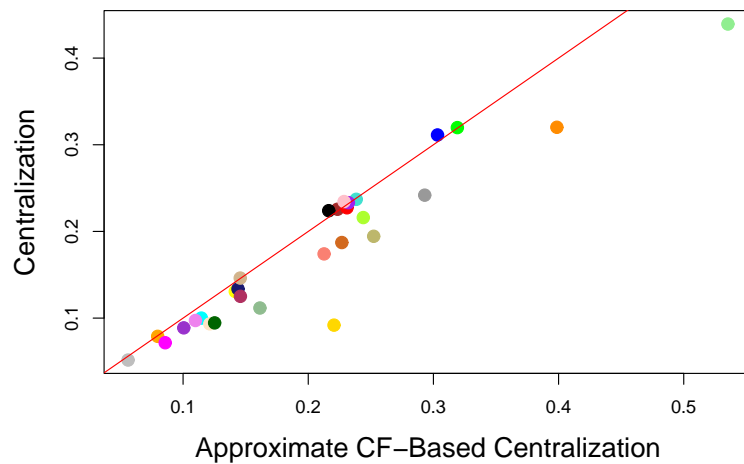

C

 $R^2=0.87$ 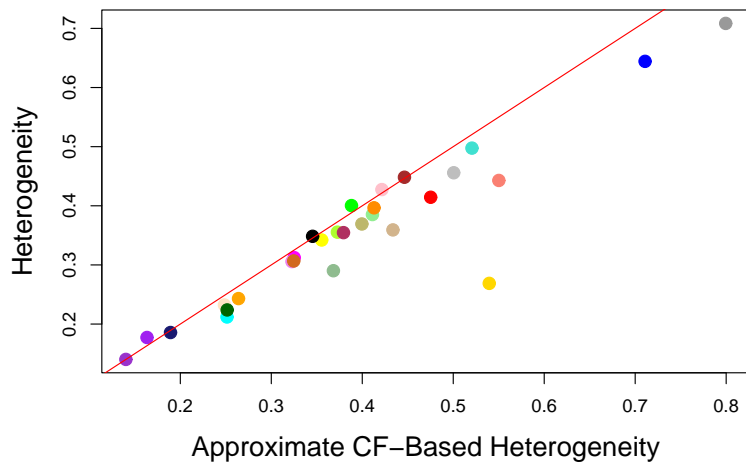

D

 $R^2=0.87$ 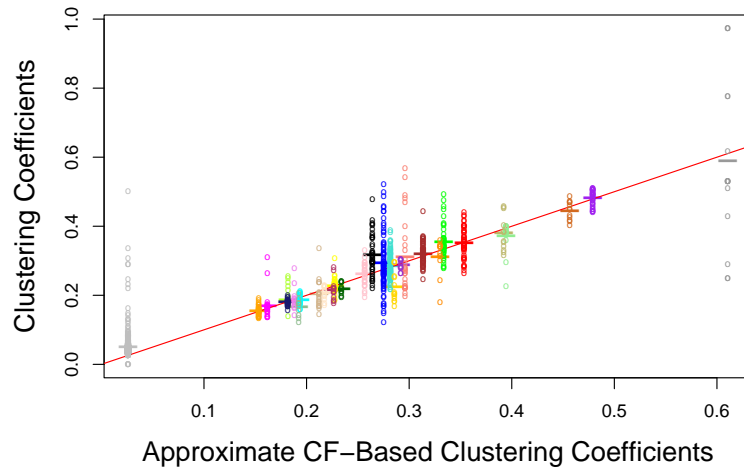

Supplement: 12918_2007_24_MOESM7_ESM.pdf [file 12918_2007_24_MOESM7_ESM.pdf]
