# Supplementary material for: Understanding network concepts in modules
Source: Springer Nature journal article supplement (doi:10.1186/1752-0509-1-24), 2007-06-04

A

 $p=7, R^2=0.99$ 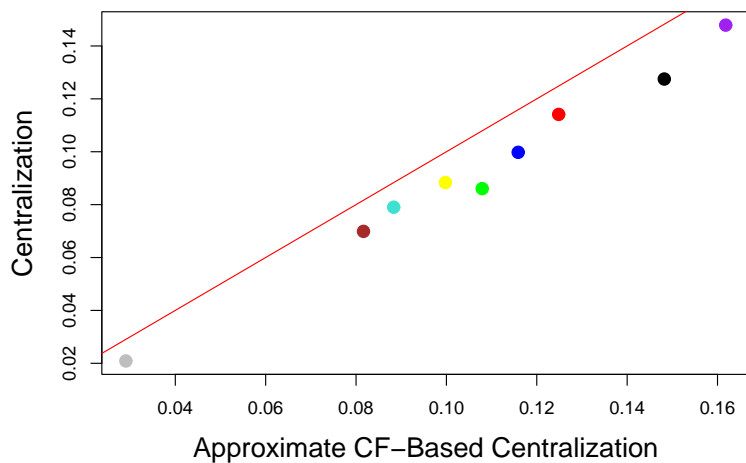

B

 $\tau=0.65, R^2=0.97$ 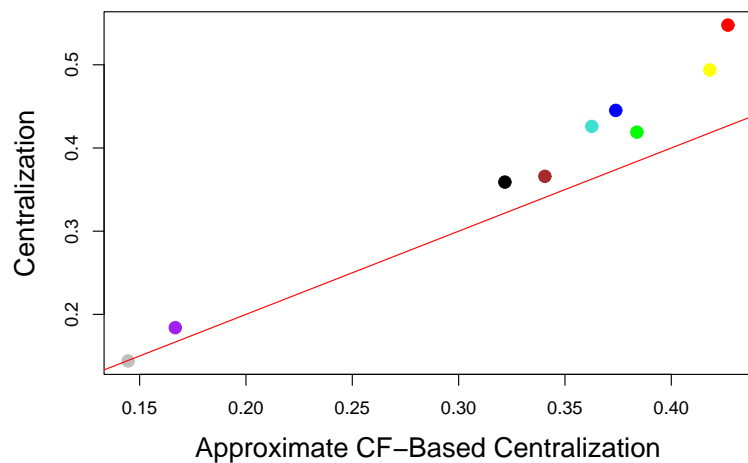

C

 $p=7$ 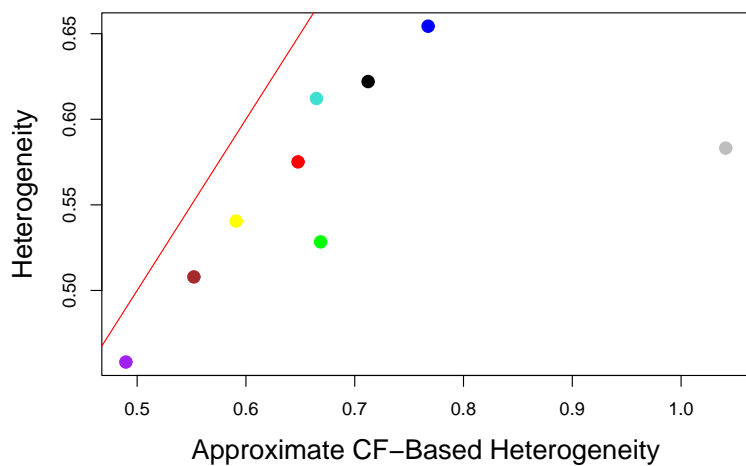

D

 $\tau=0.65$ 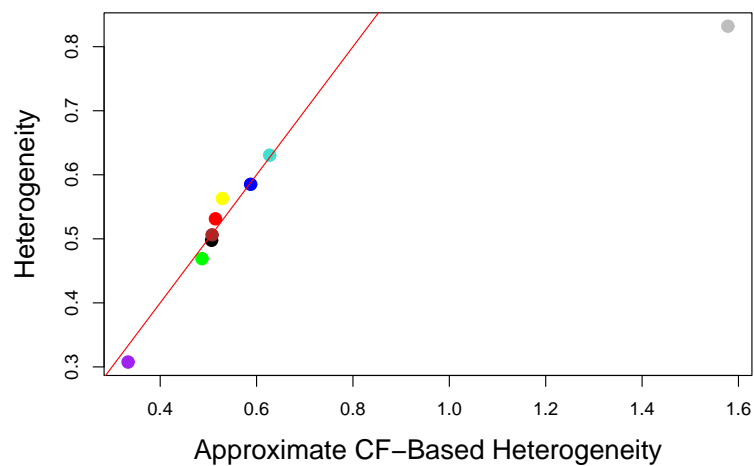

E

 $p=7, R^2=0.82$ 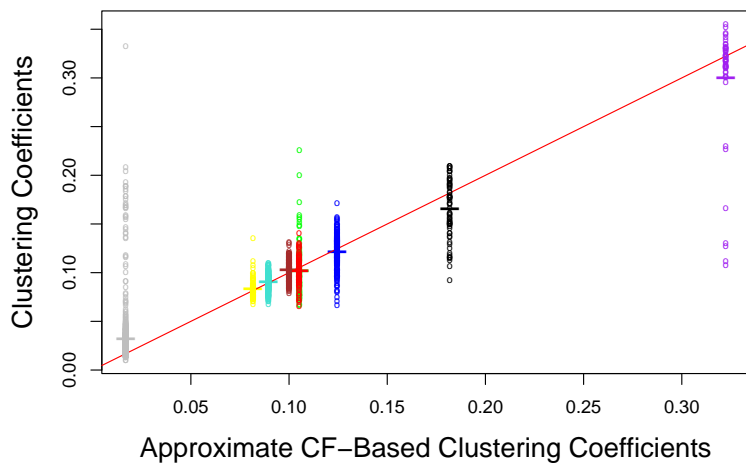

F

 $\tau=0.65, R^2=0.6$ 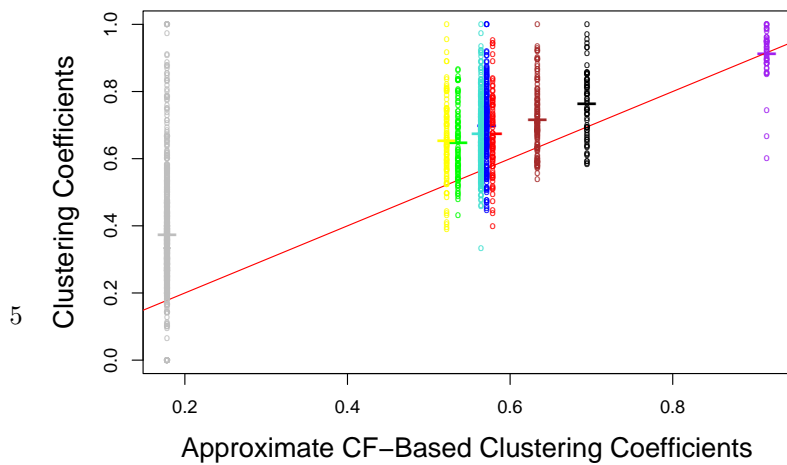

Supplement: 12918_2007_24_MOESM9_ESM.pdf [file 12918_2007_24_MOESM9_ESM.pdf]
