# Supplementary material for: Understanding network concepts in modules
Source: Springer Nature journal article supplement (doi:10.1186/1752-0509-1-24), 2007-06-04

A

 $R^2=0.74$ 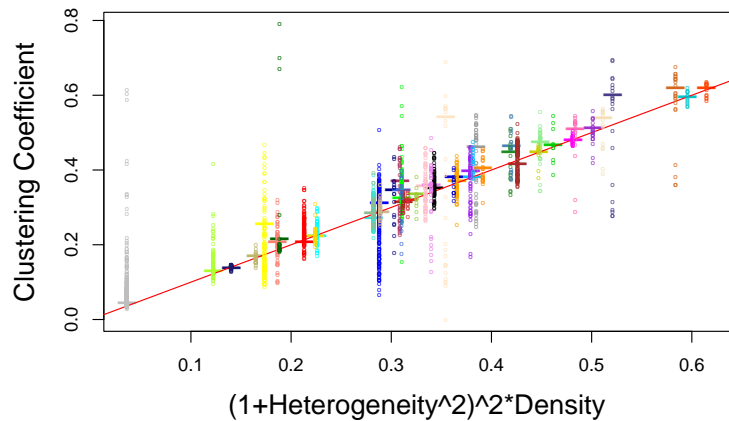

B

 $R^2=0.76$ 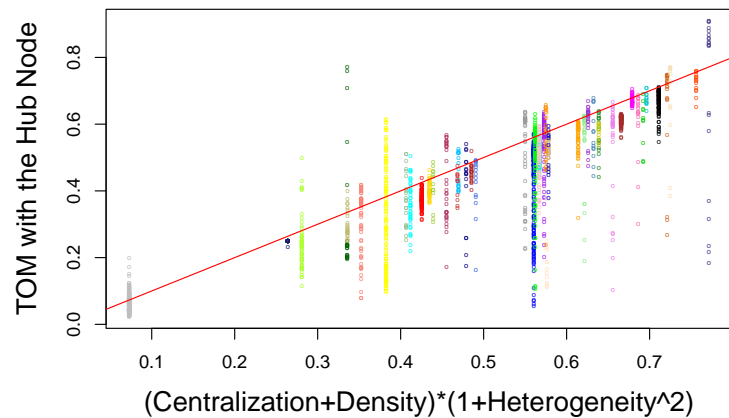

C

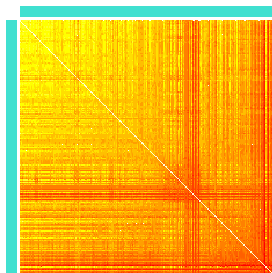

D

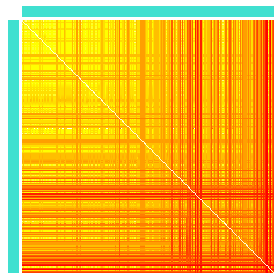

E

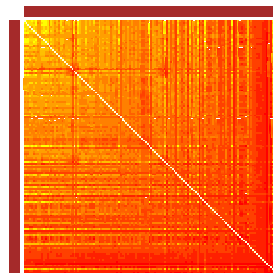

F

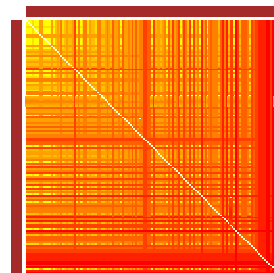

Supplement: 12918_2007_24_MOESM11_ESM.pdf [file 12918_2007_24_MOESM11_ESM.pdf]
