# Supplementary material for: Understanding network concepts in modules
Source: Springer Nature journal article supplement (doi:10.1186/1752-0509-1-24), 2007-06-04

A

$p=7, R^2=0.82$

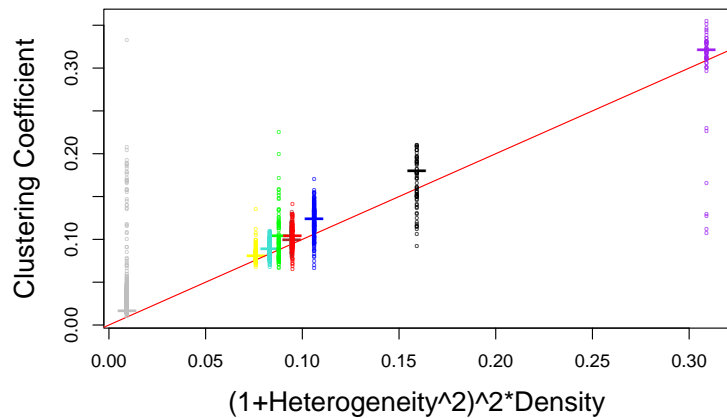

B

$\tau=0.65, R^2=0.6$

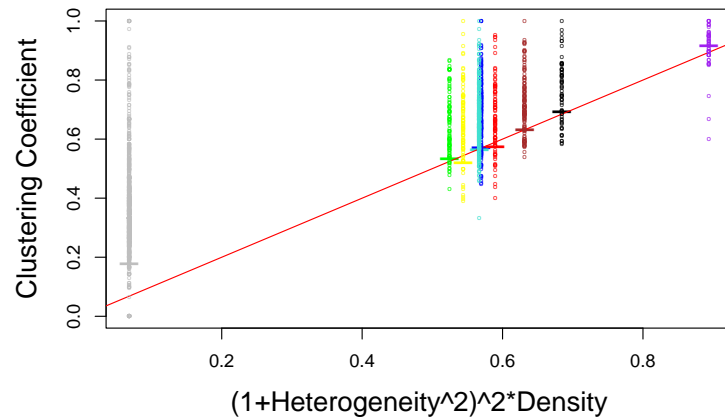

C

$p=7, R^2=0.81$

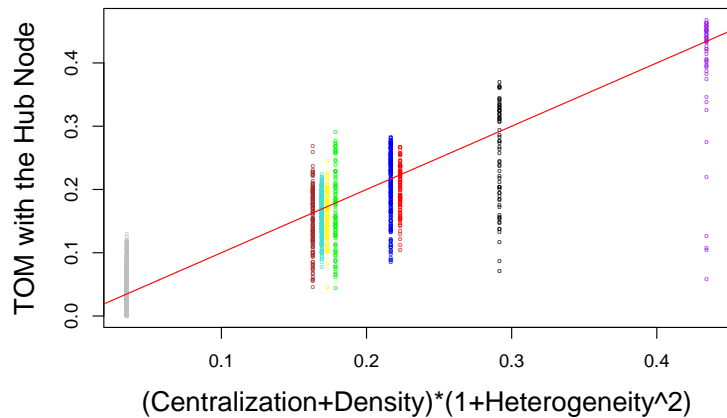

D

$\tau=0.65, R^2=0.74$

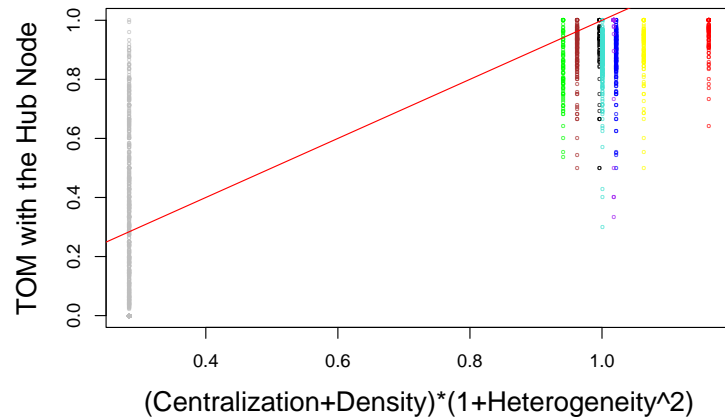

Supplement: 12918_2007_24_MOESM12_ESM.pdf [file 12918_2007_24_MOESM12_ESM.pdf]
